# Supplementary material
Source: Springer Nature journal article supplement (https://www.springermedizin.de/resource/supplementary/12959_2008_101_MOESM2_ESM.pdf/9569598)

ADP 5  $\mu$ M

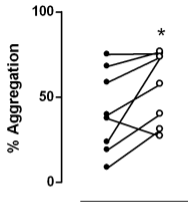

ADP 5  $\mu$ M

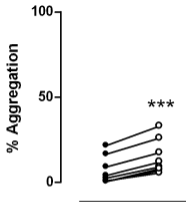

ADP 5  $\mu$ M

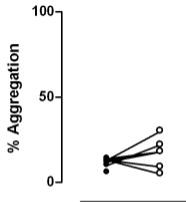

Supplement: MOESM2 [file 9569598]
